# Supplementary material
Source: PubMed Central journal article supplement (PMC10499027)
Supplement: joces-136-261270-s1.pdf [file joces-136-261270-s1.pdf]

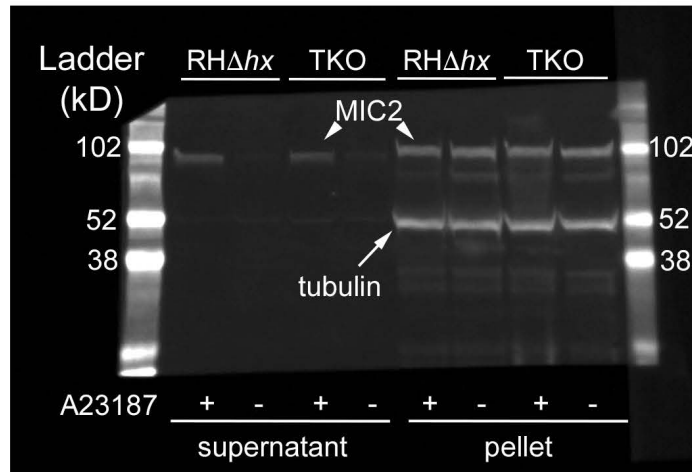

Quantification of levels of MIC2 in the secreted fractions upon A23187 stimulation in the RH $\Delta$ hx parental and TKO parasites in 3 independent biological replicates. For each sample, the MIC2 secretion is normalized against tubulin in the pellet from the same sample.

| Parasite strain | replicate 1 | replicate 2 | replicate 3 | average $\pm$ SEM |
|-----------------|-------------|-------------|-------------|-------------------|
| RH $\Delta$ hx  | 0.30        | 0.44        | 0.68        | 0.48 $\pm$ 0.14   |
| TKO             | 0.21        | 0.31        | 0.42        | 0.31 $\pm$ 0.07   |

**Fig. S1. (Blot Transparency)**

*Top:* Image of Western blot that contains data displayed in Fig 6C. Western blot of the secreted (supernatant) and unsecreted (pellet) fractions of RH $\Delta$ hx and TKO parasites with (+) or without (-) A23187 treatment. The blot was probed by antibodies against MIC2 and tubulin. Lanes for molecular weight ladders are included.

*Bottom:* Quantification of levels of MIC2 in the secreted fractions upon A23187 stimulation in the RH $\Delta$ hx parental and TKO parasites in 3 independent biological replicates.

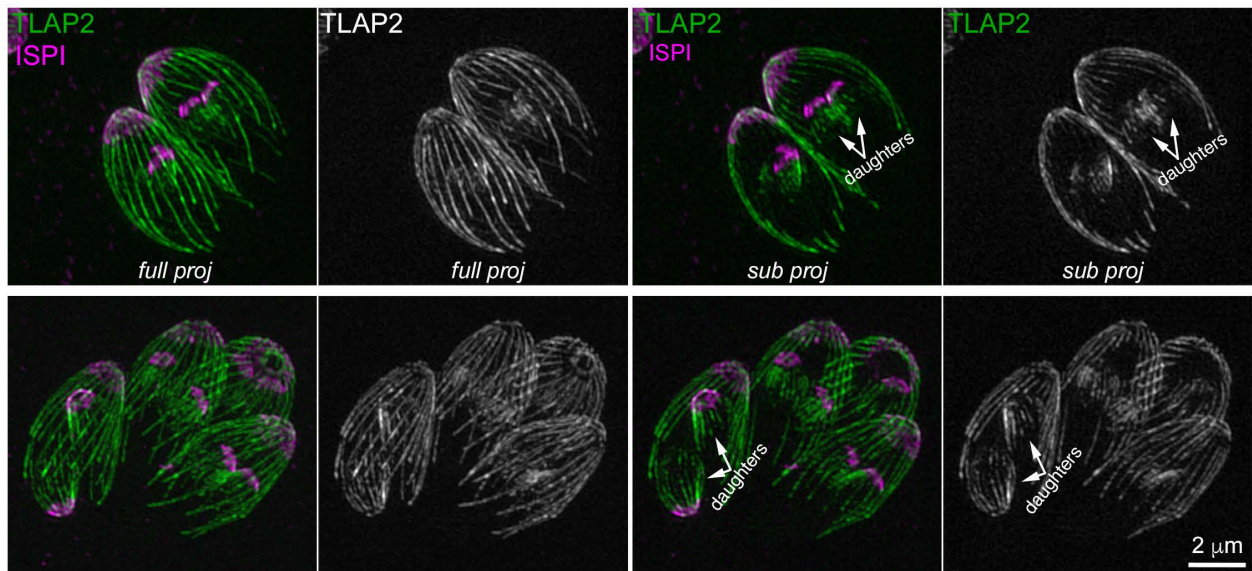

**Fig. S2.** Full and subset projections of 3D-SIM image stacks of dividing intracellular *mEmeraldFP-TLAP2* knock-in parasites showing that TLAP2 is recruited to the daughter cortical microtubules. Green and grayscale: mEmerald-FP-TLAP2. Magenta: apical cortex labeling with a mouse anti-ISP1 antibody. Parasites at an earlier (top) and a later stage (bottom) of daughter formation are shown.

### Table S1. Numbers of data points

[Click here to download Table S1](#)

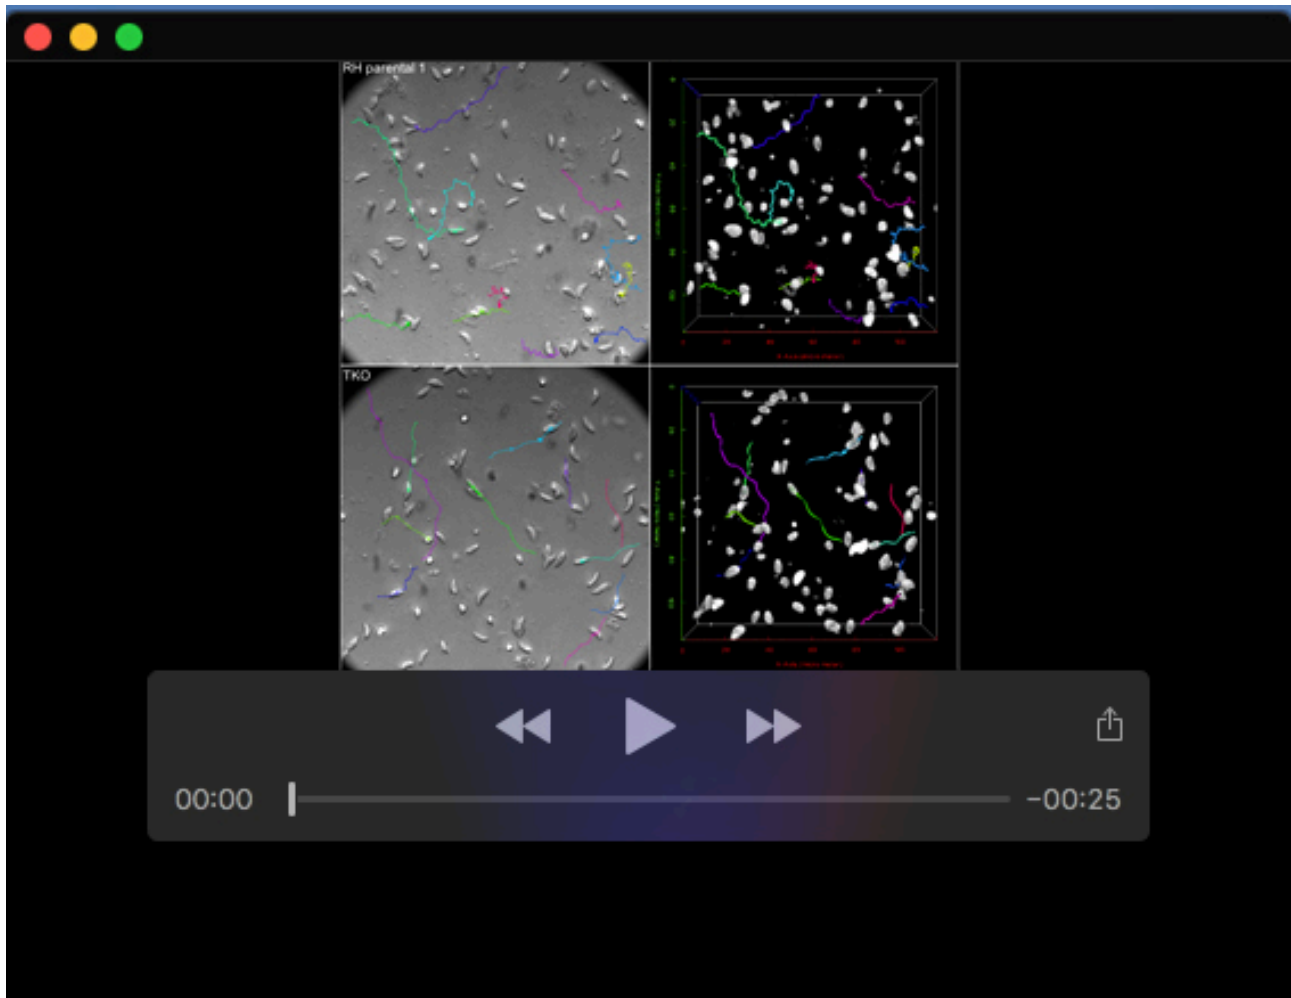

**Movie 1.** Time-lapse microscopy of 3-D motility in 50% Matrigel for the RH $\Delta$ hx (RH parental 1) and TKO parasites. *Left:* Videos of projected DIC images (projections of 3-D stack generated by Stack focuser in ImageJ/Fiji). *Right:* Corresponding processed images with a subset of 3-D trajectories. Time interval:  $\sim$  1.36 sec. Video speed: 10 frames/s.

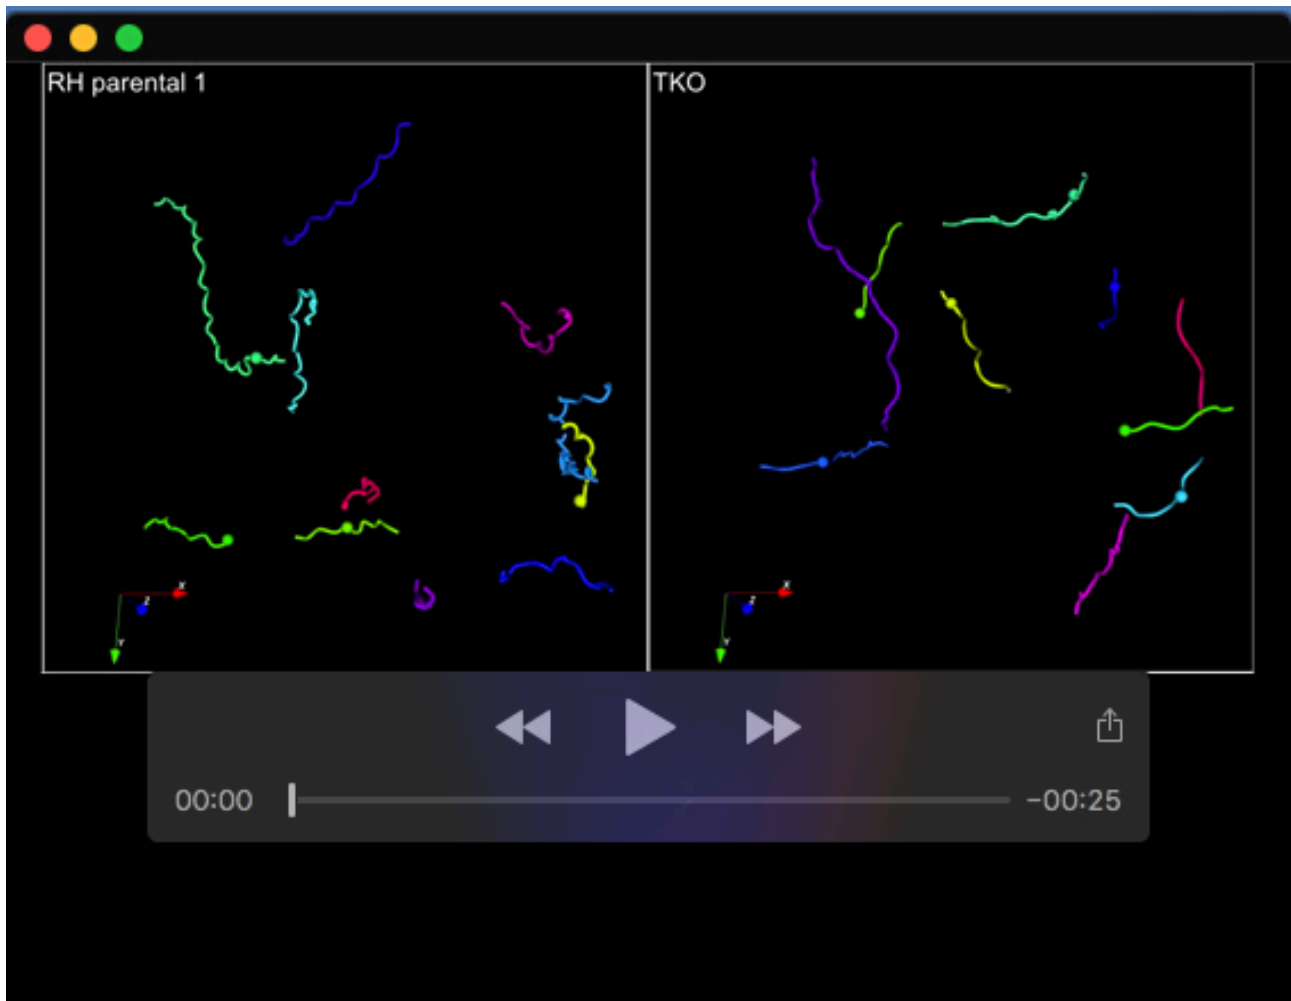

**Movie 2.** Rotational view of 3-D trajectories for the  $RH\Delta hx$  (RH parental 1) and TKO parasites included in Video S1. The traveling sphere associated with each track represents the centroid of the parasite traveling along that path. Length of arrow= 16  $\mu\text{m}$ .

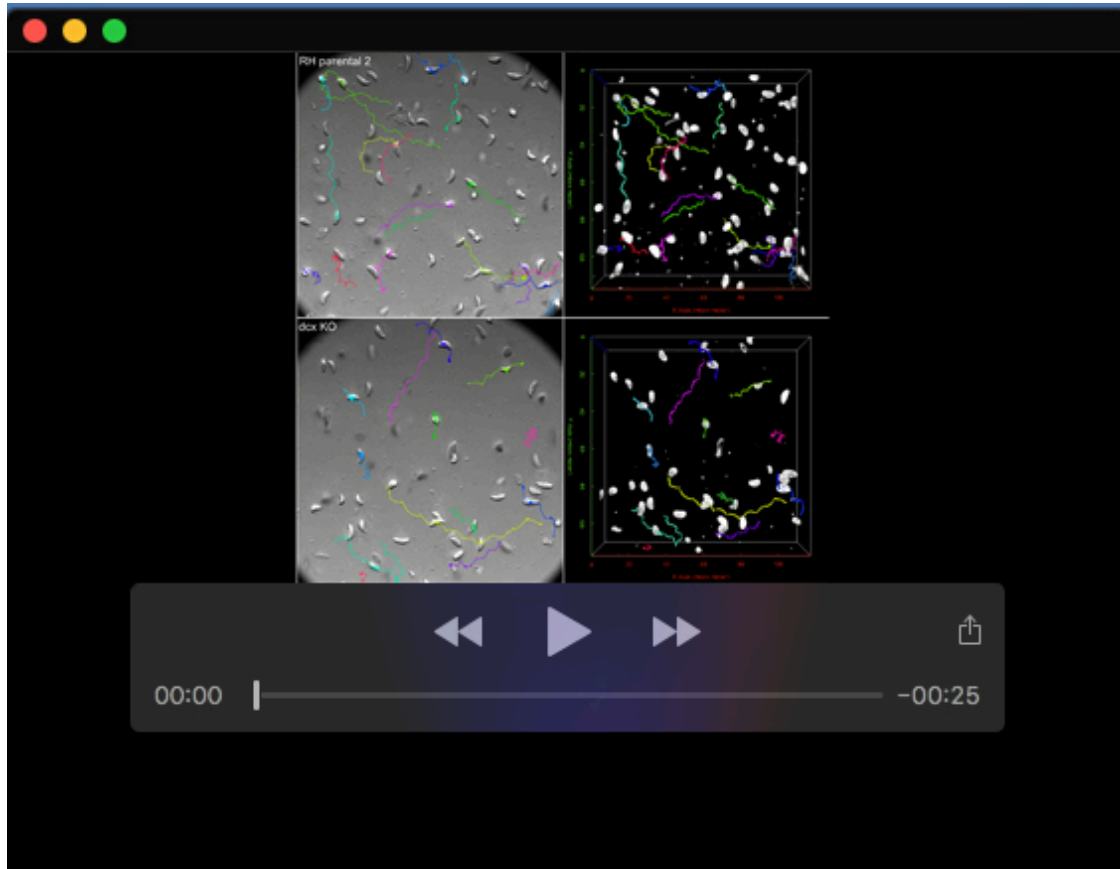

**Movie 3.** Time-lapse microscopy of 3-D motility in 50% Matrigel for the RH $\Delta ku80$  (RH parental 2) and  $\Delta dcx$  (*dcx KO*) parasites. *Left:* Videos of projected DIC images (projections of 3-D stack generated by Stack focuser in ImageJ/Fiji). *Right:* Corresponding processed images with a subset of 3-D trajectories. Time interval: ~ 1.36 sec. Video speed: 10 frames/s.

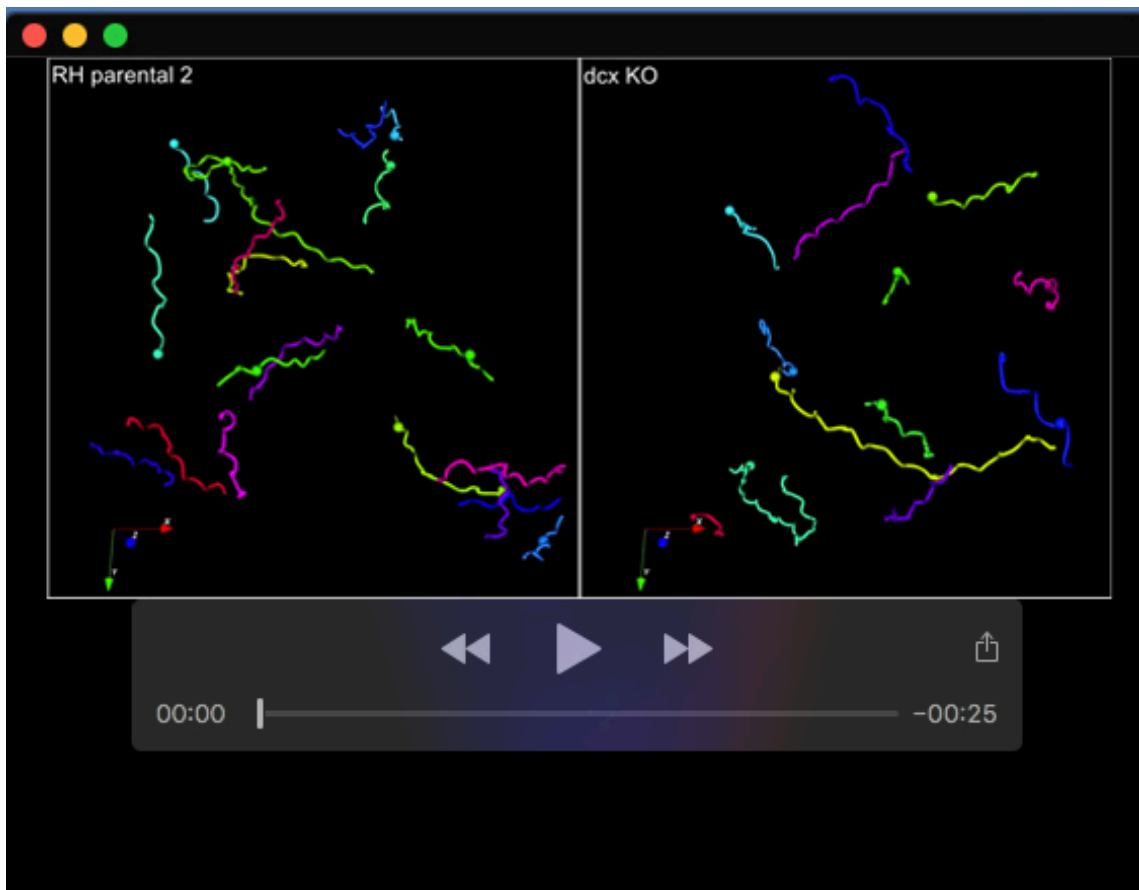

**Movie 4.** Rotational view of 3-D trajectories for the RH $\Delta ku80$  (RH parental 2) and  $\Delta dcx$  (*dcx KO*) parasites included in Video S3. The traveling sphere associated with each track represents the centroid of the parasite traveling along that path. Length of arrow= 16  $\mu\text{m}$ .

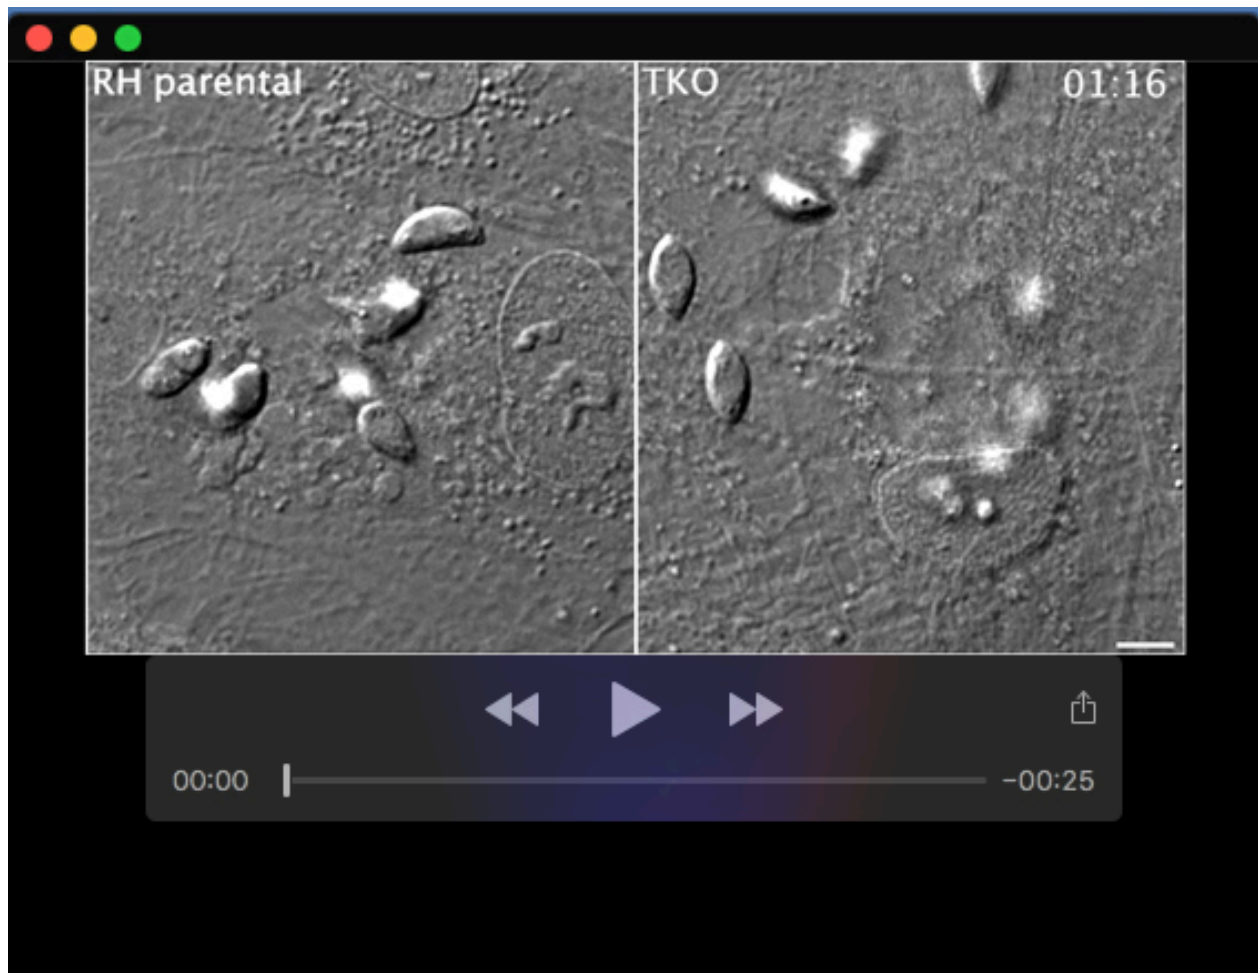

**Movie 5.** Time-lapse microscopy of A23187 induced-egress for RH $\Delta$ hx (RH parental) and TKO parasites. A23187 was added at the beginning of the movies to a final concentration of 5  $\mu$ M. The intracellular wild-type and TKO parasite cultures were placed at 7°C for 1 hr prior to the egress experiment, which was conducted at 37°C. Time interval: 1 sec. Video speed: 60 frames/s. Scale bar: 5  $\mu$ m.

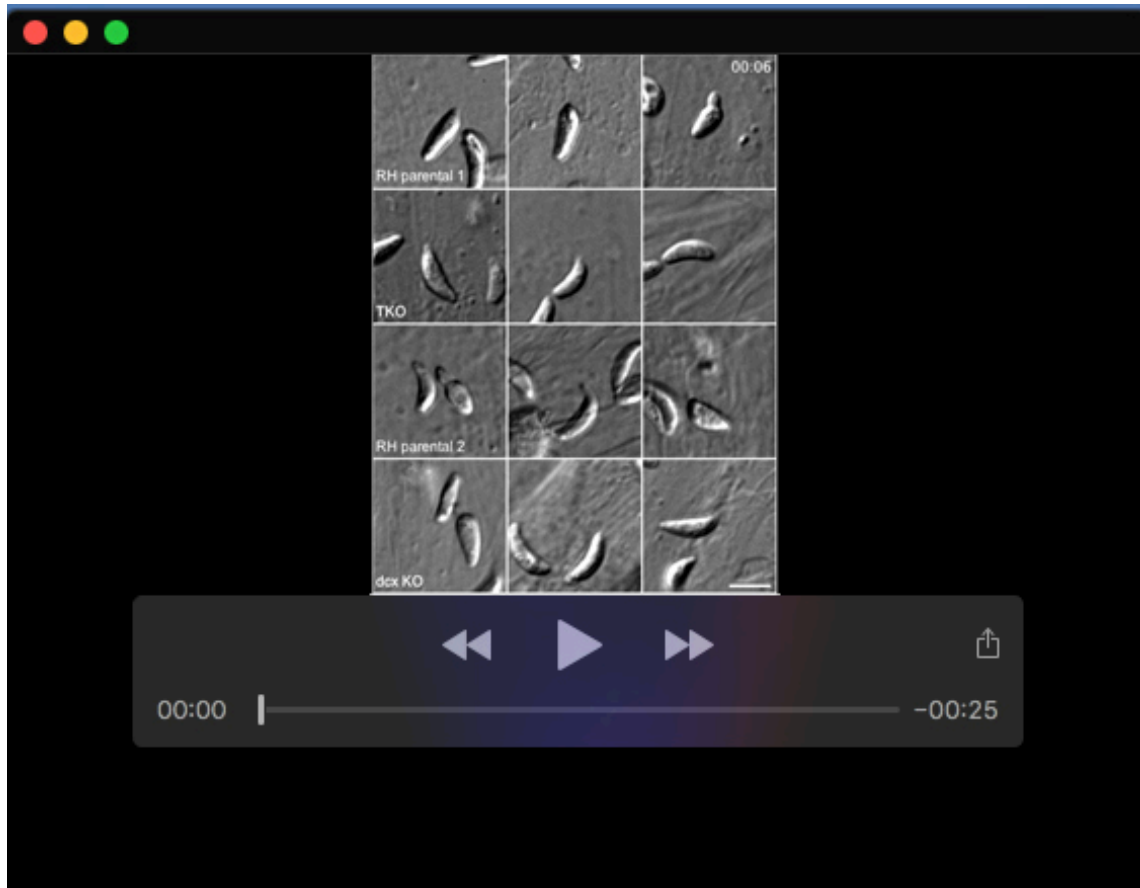

**Movie 6.** Time-lapse microscopy of host cell entry for RH $\Delta$ *hx* (RH parental 1), TKO and RH $\Delta$ *ku80* (RH parental 2) and  $\Delta$ *dcx* (*dcx KO*) parasites. Fig 6F includes images selected from the timelapses in the leftmost column. Time interval: 1 sec. Video speed: 6 frames/s. Scale bar: 5  $\mu$ m.
